# Supplementary material for: Removal of per- and polyfluoroalkyl substances (PFAS) from water by ceric(iv) ammonium nitrate
Source: Royal Society of Chemistry journal article supplement (doi:10.1039/d1ra02635f), 2021-01-01
Supplement: d1ra02635f1.pdf [file d1ra02635f1.pdf]

## Removal of Per- and Polyfluoroalkyl Substances (PFAS) from Water by Ceric (IV) Ammonium Nitrate

Jun Sun,<sup>¶a</sup> Sreenu Jennepalli,<sup>¶a</sup> Matthew Lee,<sup>c</sup> Denis M. O'Carroll,<sup>c</sup> Björn Åkermark,<sup>b</sup> Michael J. Manefield,<sup>c</sup> Biswanath Das,<sup>¶\*a,b</sup> Naresh Kumar<sup>\*a</sup>

<sup>a</sup> School of Chemistry, The University of New South Wales, Sydney, NSW 2052, Australia

<sup>b</sup> Department of Organic Chemistry, Stockholm University, Stockholm 10691, Sweden

<sup>c</sup> School of Civil and Environmental Engineering, Water Research Centre, The University of New South Wales, Sydney, NSW 2052, Australia

¶ Contributed equally to the experimental work.

### Materials and Methods

**Materials:** Ceric (IV) ammonium nitrate (CAN) ( $\geq 98.5\%$ ), Cerium (III) chloride heptahydrate, Iron (II) chloride, Ammonium acetate, Methanol (hypergrade for LC-MS) and Acetic Acid ( $\geq 99.99\%$  trace metals basis) were purchased from Sigma-Aldrich (<https://www.sigmaaldrich.com>). Cobalt(II) chloride hexahydrate was purchased from May and Baker. Ammonium nitrate (AN) ( $>95\%$ ) was purchased from Merck (<https://www.merckmillipore.com/AU/en>). Cerium sulfate was purchased from LabChem (<https://www.labchem.com/>). Perfluoro-n-octanoic acid (PFOA) (98%) was purchased from Synquest Laboratories (<http://www.synquestlabs.com>). Potassium salt of perfluorooctanesulfonic acid (PFOS) (98%) (branched isomers is 15% and Linear PFOS is 85% according to LC-MS) was purchased from Matrix Scientific (<https://www.matrixscientific.com>). Milli Q water was used in all experiments.

**Adsorption Experiments:** For testing low concentration PFAS system, PFASs were dissolved in Milli Q water as stock solution (30  $\mu\text{M}$  for PFOA, 20  $\mu\text{M}$  for PFOS).  $\text{Ce}(\text{SO}_4)_2$ , CAN, AN and other metal salts ( $\text{FeCl}_2$ ,  $\text{CoCl}_2$ ,  $\text{CoCl}_3$ ) were dissolved in Milli Q water to make 6 mM stock solution. 0.5 ml or 0.75 ml PFAS stock solution (0.5 ml for PFOA and 0.75 ml for PFOS), different amount CAN (or  $\text{Ce}(\text{SO}_4)_2$ , AN, other metal salts solution) and Milli Q water were mixed to achieve 1 ml system. Then the tubes were shaken 3 minutes at room temperature. After that, all samples were centrifuged at 10000 rpm and 100  $\mu\text{l}$  supernatant was taken out and diluted uniformly (to reach below 100 ppb concentration) before LC-MS testing.

For high concentration PFAS system, PFASs were dissolved in Milli Q water to prepare the stock solutions (3 mM for PFOA, 2 mM for PFOS). CAN was dissolved in Milli Q water to make 0.6 M stock solution. 0.5 ml or 0.75 ml PFAS stock solution (0.5 ml for PFOA, 0.75 ml for PFOS), different amount CAN stock solution and Milli Q water were added to 2 ml centrifuge tube to achieve 1 ml adsorption-complexation system. Then the tubes were shaken by a Vortex for 3 minutes at room temperature. After that, samples were centrifuged at 10000 rpm, then 100  $\mu\text{l}$  supernatant was taken out and diluted uniformly (to reach below 100 ppb concentration) before LC-MS testing.

In order to investigate the effect of time, the tubes were kept for 3 days at room temperature. Then all the samples were centrifuged and 100  $\mu\text{l}$  supernatant was taken out and diluted equally (to reach below 100 ppb concentration) before LCMS testing.

**Measurement of PFAS:** The concentration of different PFASs including PFOA and PFOS were analyzed by a Shimadzu LCMS-8050 and Nexera X2 LC system (Shimadzu, Kyoto, Japan). Shim-pack XR-ODSIII column was used for separation at 40  $^{\circ}\text{C}$  using binary gradient of solvent A (methanol) and B (5 mM ammonium acetate in 0.05 % acetic acid). The total flow rate was 0.4  $\text{mLmin}^{-1}$ . To identify the PFAS compounds, the electrospray negative ionization mode was used.

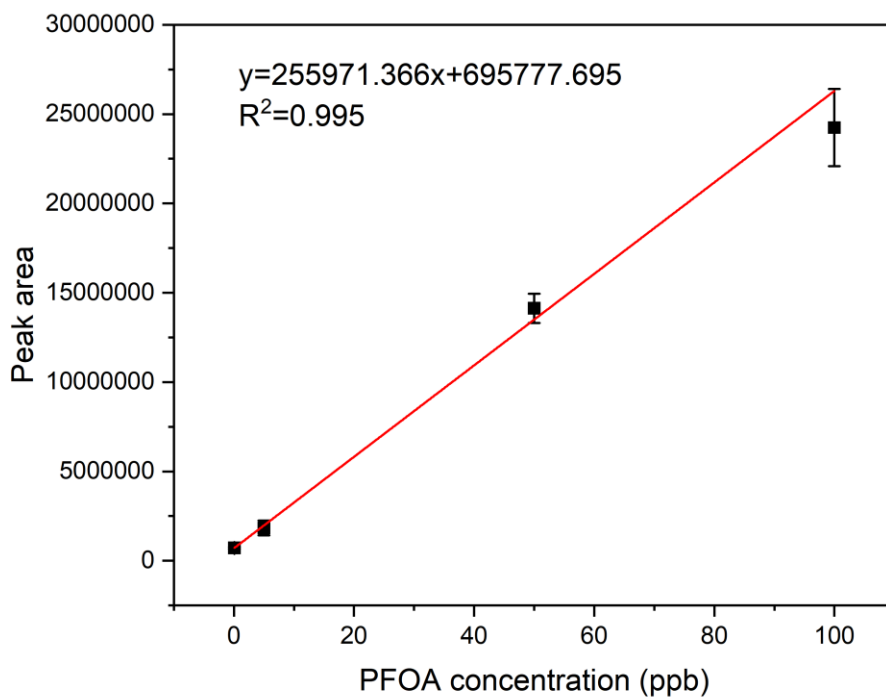

**Figure. S1.** Standard curve of PFOA

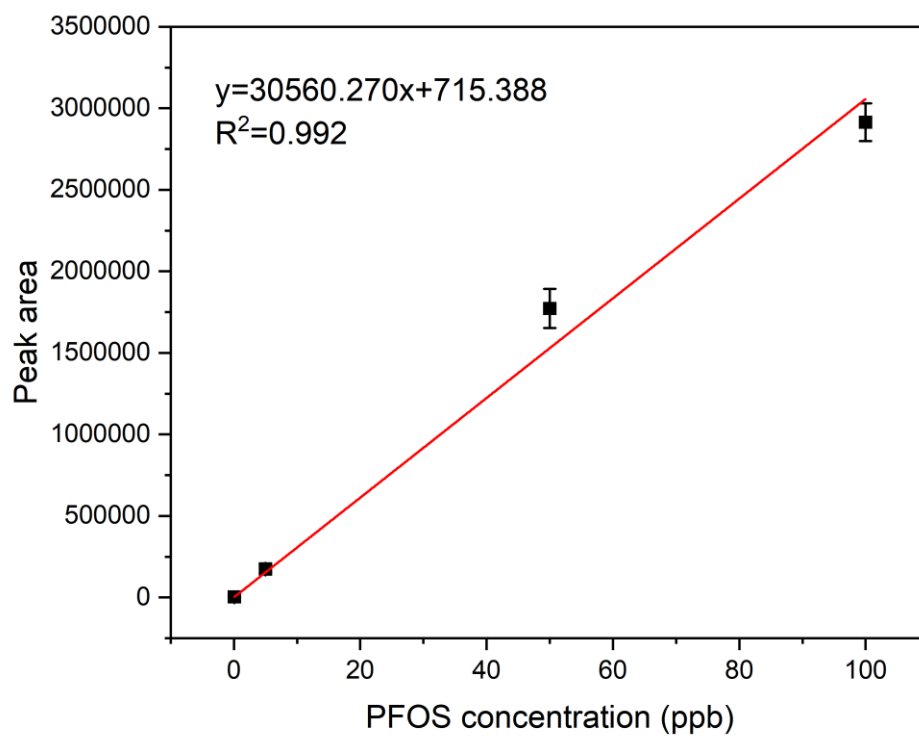

**Figure. S2.** Standard curve of PFOS

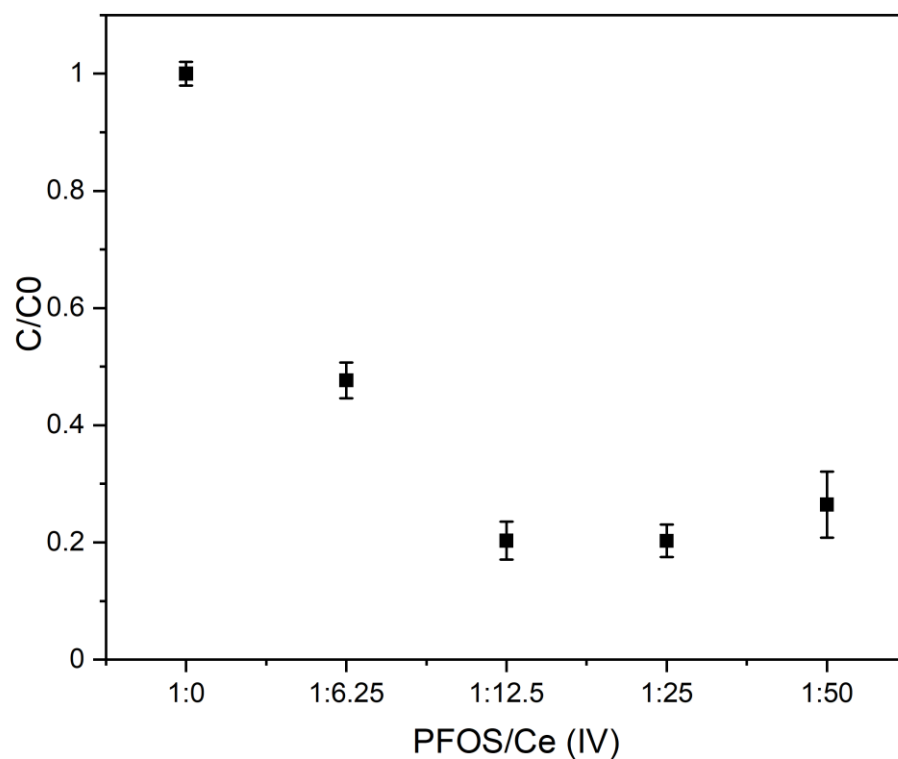

**Figure. S3.** The LC-MS detected concentrations of 15  $\mu$ M of PFOS in water before [PFOS:Ce(IV)]=1:0) and after the treatment (3 minutes) with 0.094 mM, 0.19 mM, 0.38 mM and 0.75 mM of CAN.

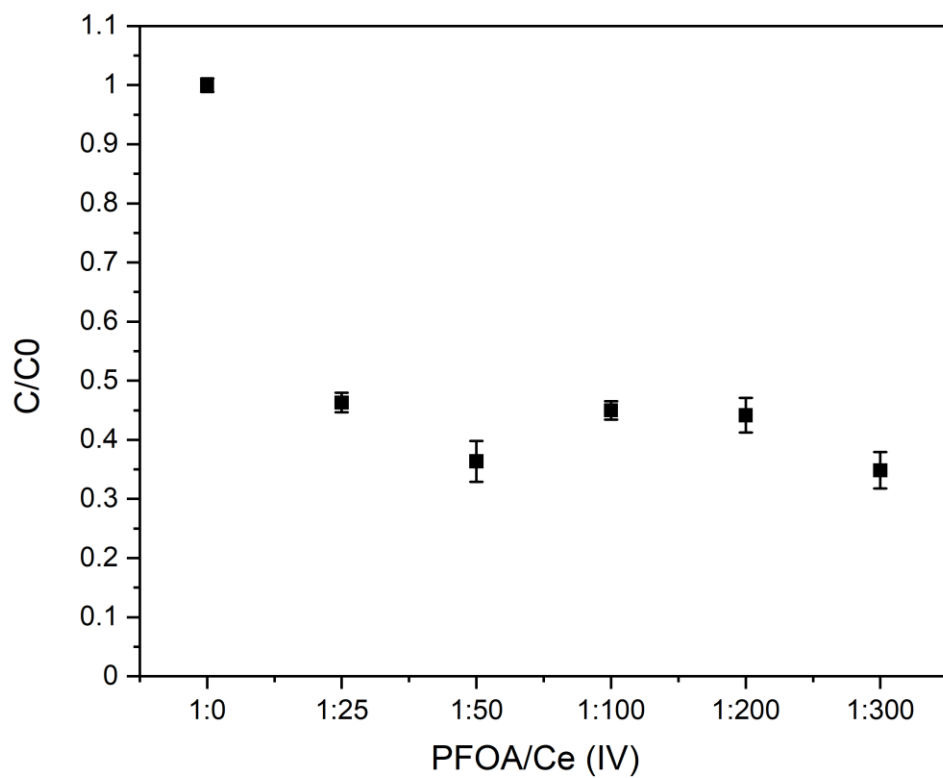

**Figure. S4.** The LC-MS detected concentrations of 15  $\mu\text{M}$  of PFOA in water before [PFOA:Ce(IV)]=1:0) and after the treatment (3 minutes) with 0.38 mM, 0.75 mM, 1.5 mM, 3 mM and 4.5 mM of CAN.

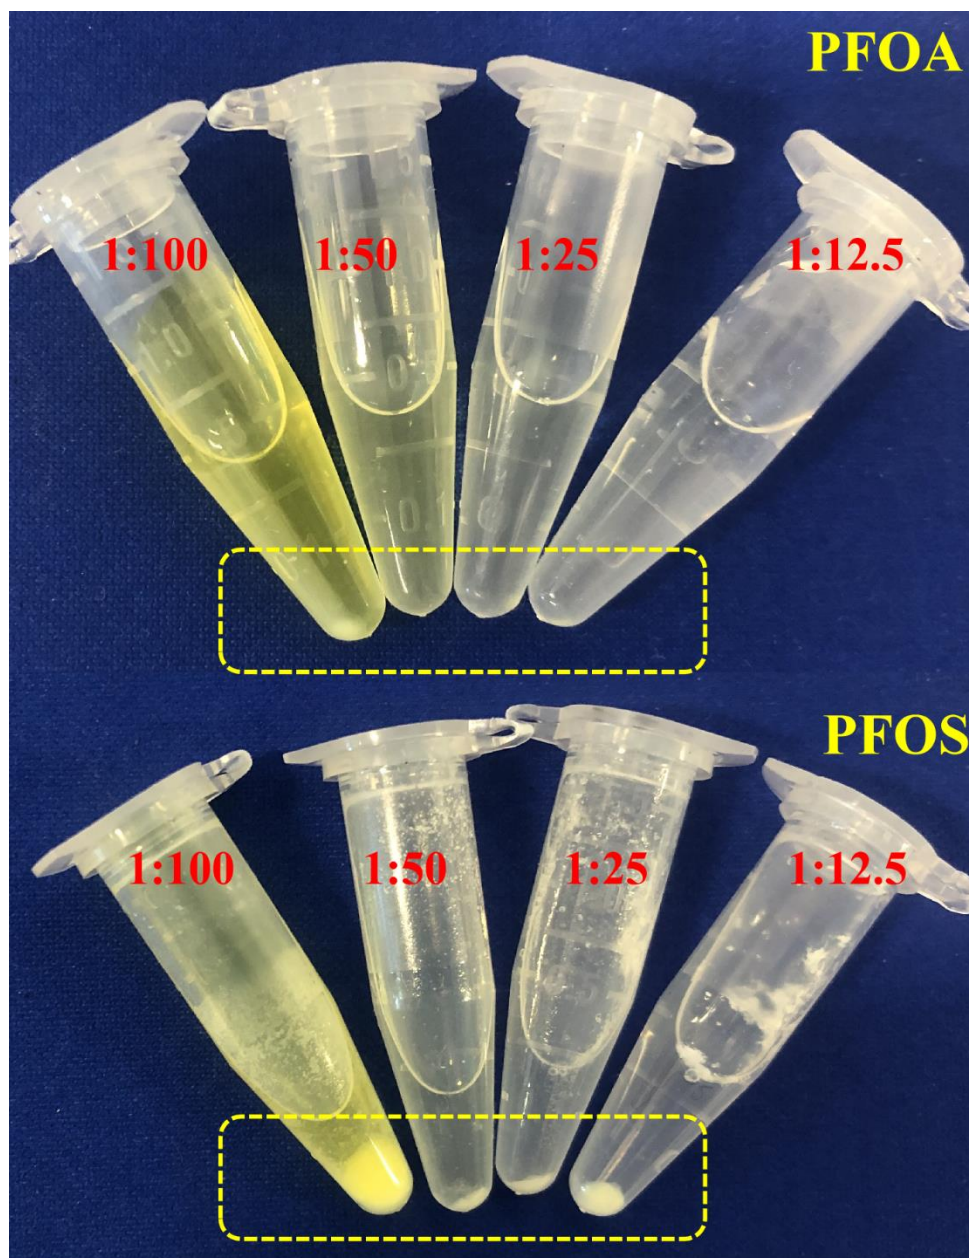

**Figure. S5.** Precipitates for 1.5 mM PFAS (PFOA and PFOS) in water after treatment with 0.15 M, 0.075 M, 0.038 M, and 0.019 M of CAN for three days.

**<sup>19</sup>F-NMR and HRMS experiments:**

<sup>19</sup>F NMR spectra were recorded in the solvents specified using a Bruker Avance 400 MHz spectrometer as designated. Chemical shifts are quoted in parts per million (ppm), to the nearest 0.01 ppm and internally referenced relative to the solvent nuclei. High-resolution mass spectrometry was performed by the Bioanalytical Mass Spectrometry facility, UNSW.

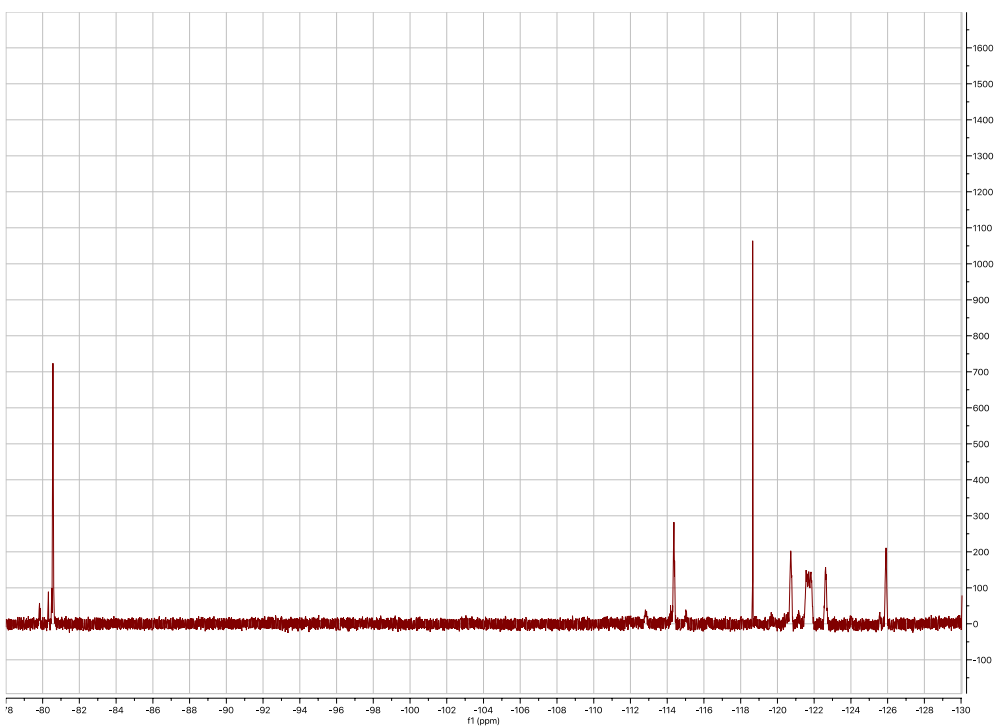

Figure. S6.  $^{19}\text{F}$  NMR of PFOS dissolved in DMSO- $d_6$

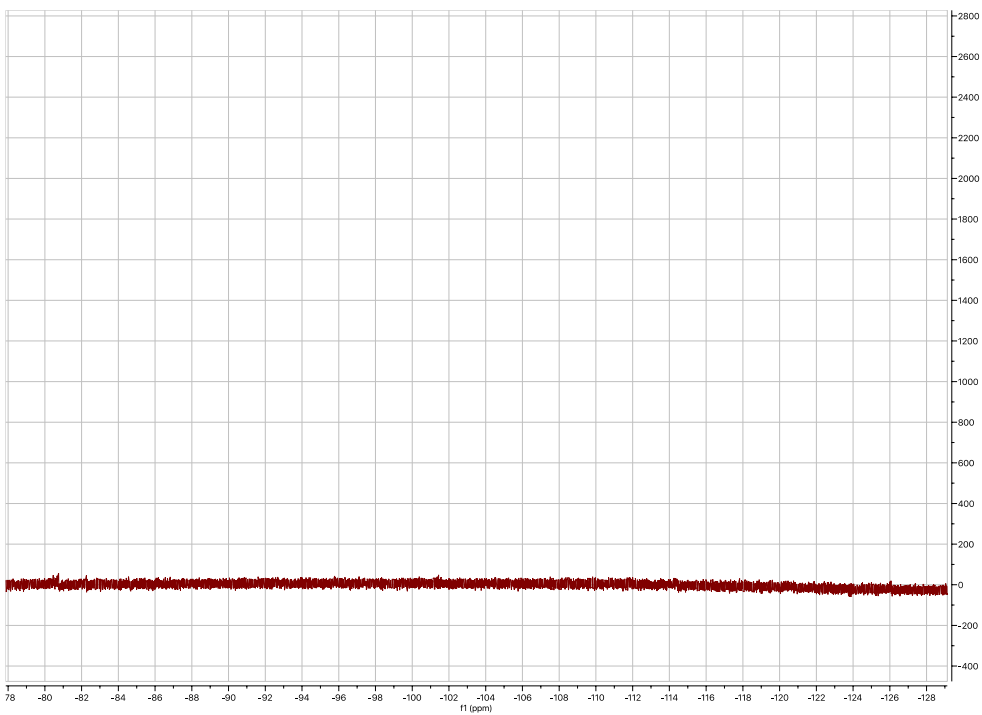

Figure. S7.  $^{19}\text{F}$  NMR of PFOS filtrate from the PFOS and CAN reaction

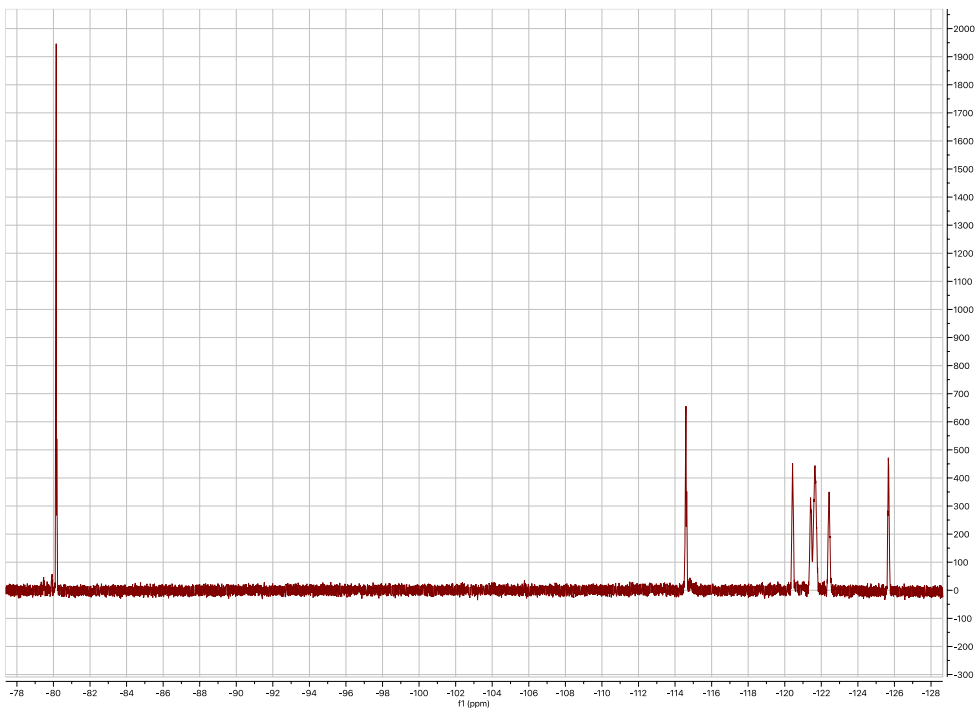

**Figure. S8.**  $^{19}\text{F}$  NMR of PFOS precipitate after the CAN reaction

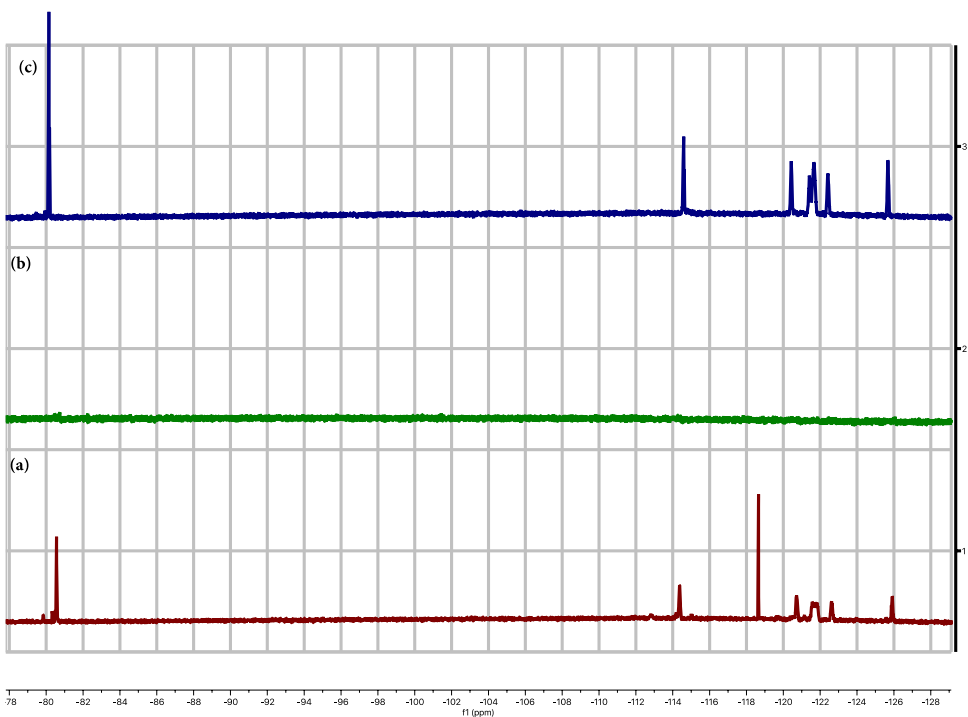

**Figure. S9.** Stacked  $^{19}\text{F}$  NMR of PFOS (a) PFOS dissolved in  $\text{DMSO-d}_6$  (b) The filtrate from the PFOS and CAN reaction (c). PFOS precipitate after the CAN reaction.



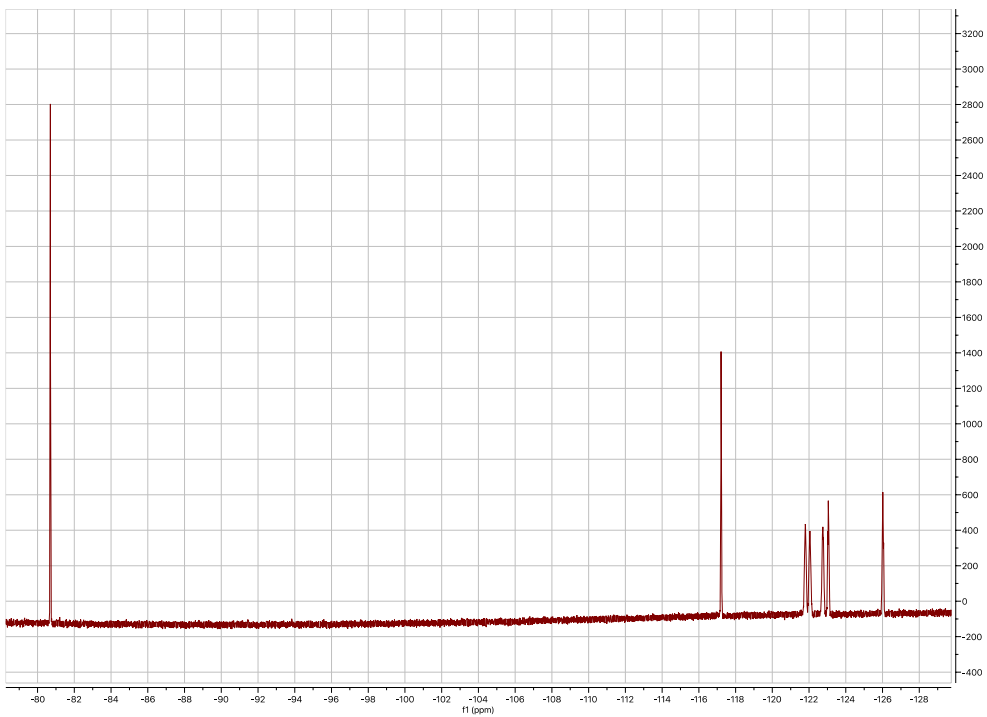

Figure. S10.  $^{19}\text{F}$  NMR of PFOA dissolved in  $\text{DMSO-d}_6$

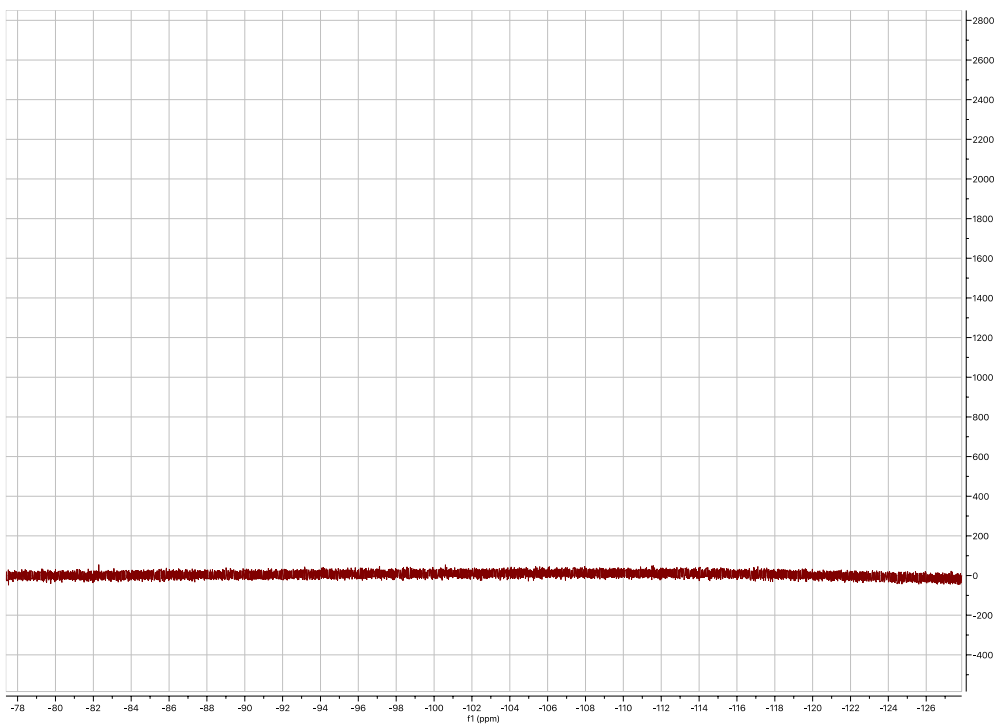

Figure. S11.  $^{19}\text{F}$  NMR of PFOA filtrate from the PFOA and CAN reaction

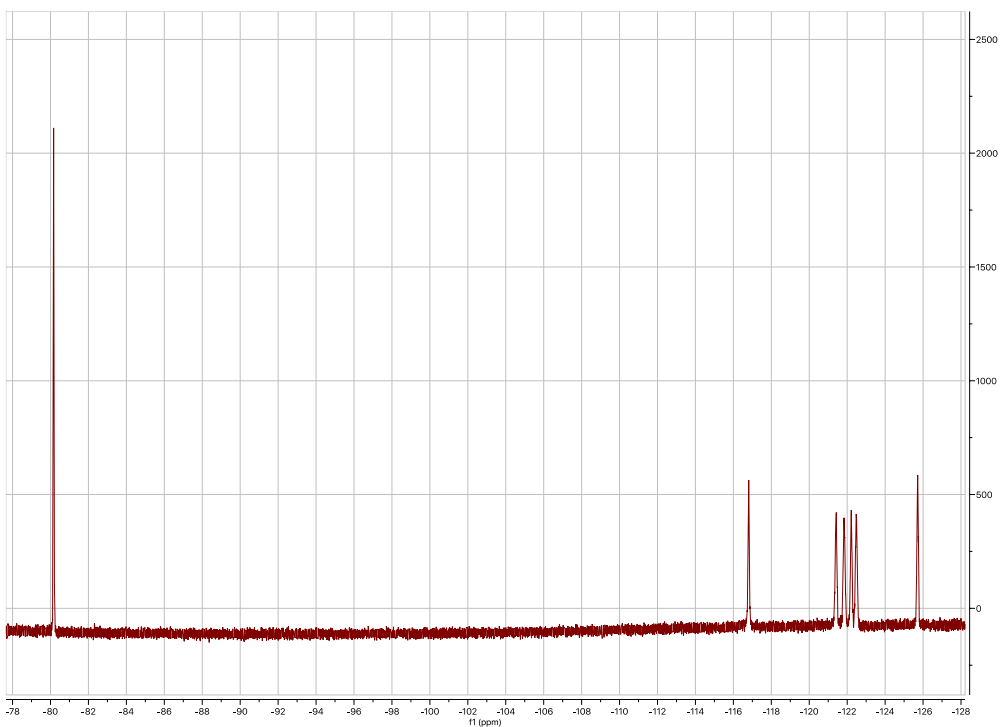

**Figure. S12.**  $^{19}\text{F}$  NMR of PFOA precipitate after the CAN reaction

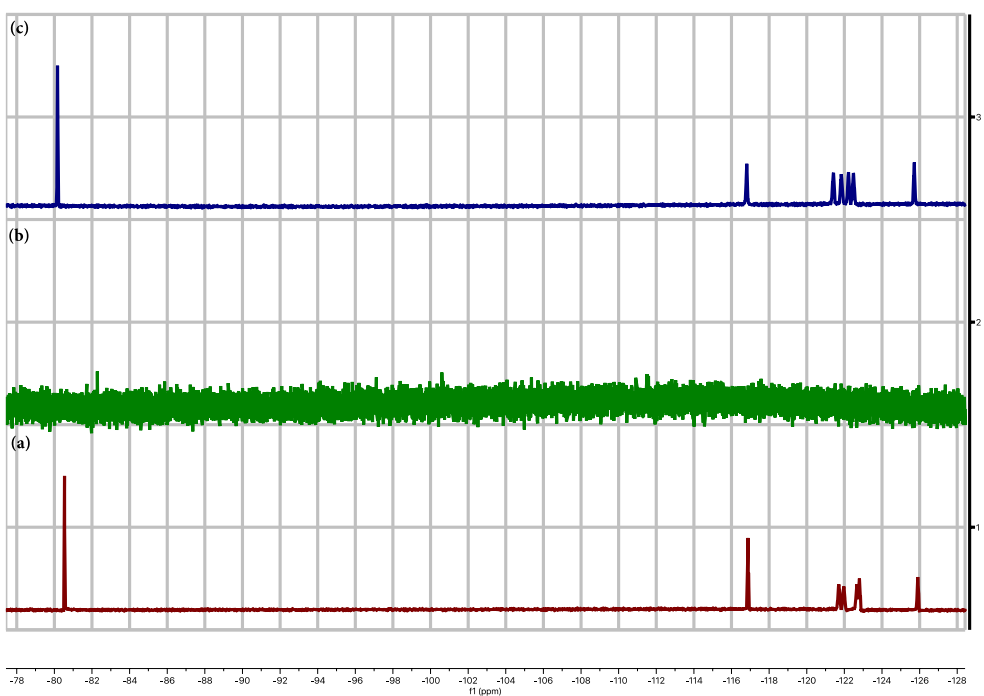

**Figure. S13.** Stacked  $^{19}\text{F}$  NMR of PFOA (a) PFOA dissolved in DMSO- $d_6$  (b) The filtrate from the PFOA and CAN reaction (c). PFOA precipitate after the CAN reaction

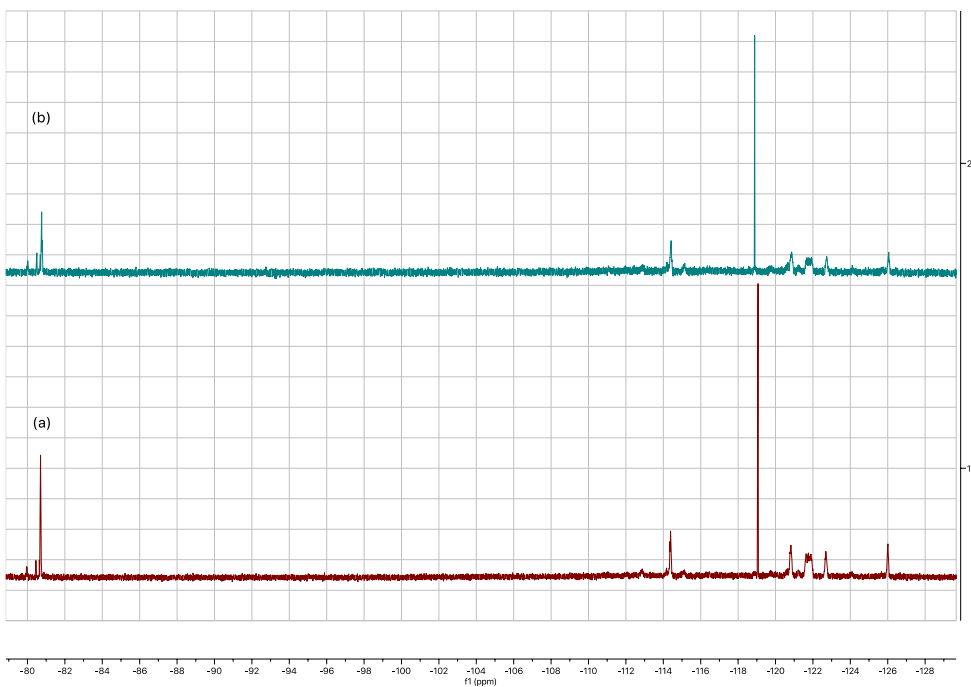

**Figure. S14.** Stacked  $^{19}\text{F}$  NMR of PFOS (a) PFOS dissolved in DMSO- $d_6$  (b) The filtrate from the PFOS and Ammonium Nitrate ( $\text{NH}_4\text{NO}_3$ ) reaction.

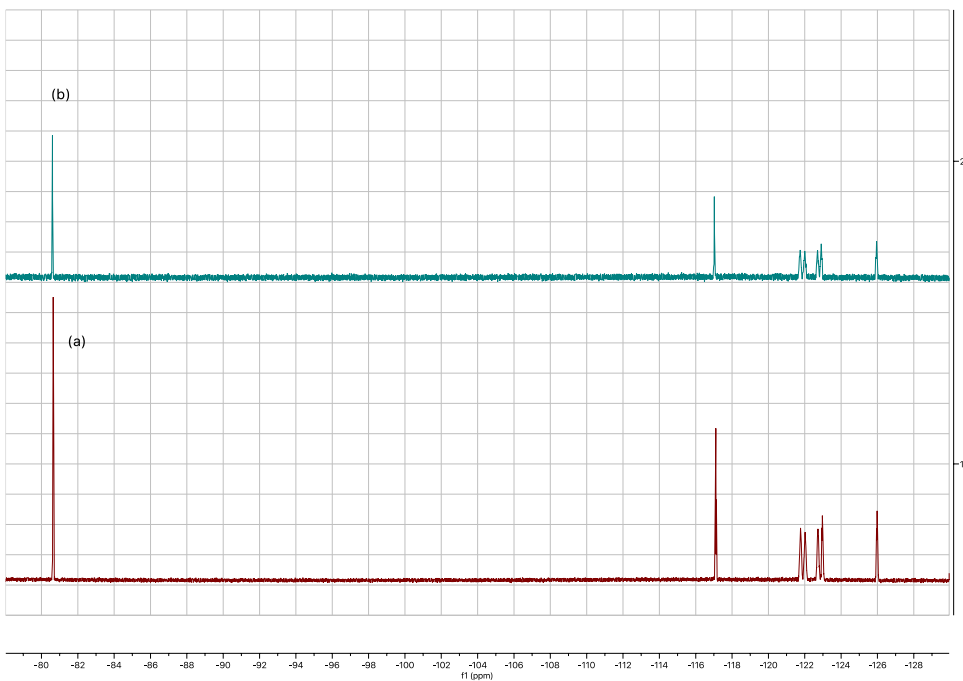

**Figure. S15.** Stacked  $^{19}\text{F}$  NMR of PFOA (a) PFOA dissolved in DMSO- $d_6$  (b) The filtrate from the PFOA and Ammonium Nitrate ( $\text{NH}_4\text{NO}_3$ ) reaction.

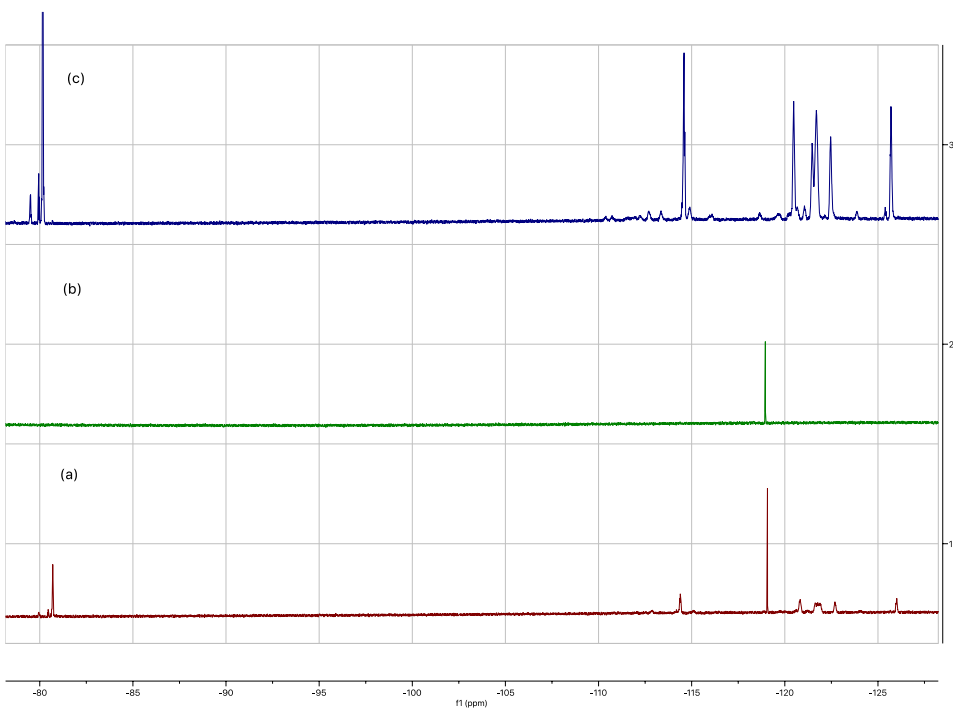

**Figure. S16.** Stacked  $^{19}\text{F}$  NMR of PFOS (a) PFOS dissolved in DMSO-d<sub>6</sub> (b) The filtrate from the PFOS and  $\text{Ce}(\text{SO}_4)_2$  reaction (c). PFOS precipitate after the  $\text{Ce}(\text{SO}_4)_2$  reaction

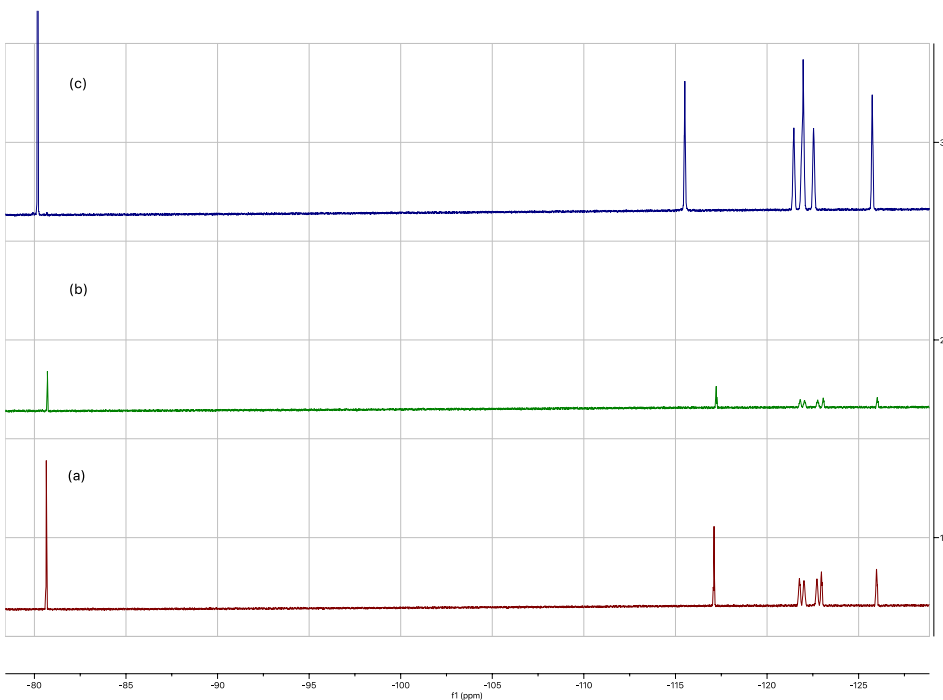

**Figure. S17.** Stacked  $^{19}\text{F}$  NMR of PFOA (a) PFOA dissolved in DMSO-d<sub>6</sub> (b) The filtrate from the PFOA and  $\text{Ce}(\text{SO}_4)_2$  reaction (c) PFOA precipitate after the  $\text{Ce}(\text{SO}_4)_2$  reaction.

## Sample submission report

Sample Analysis Request # **3092932**  
Samples submitted by **Jun Sun**  
Date run **2020-12-08**  
Operator **Chowdhury Sarowar**  
Report prepared by **Chowdhury Sarowar**

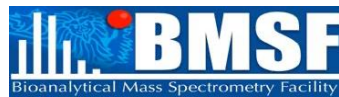

Notes:

Sample: 7

Full spectrum

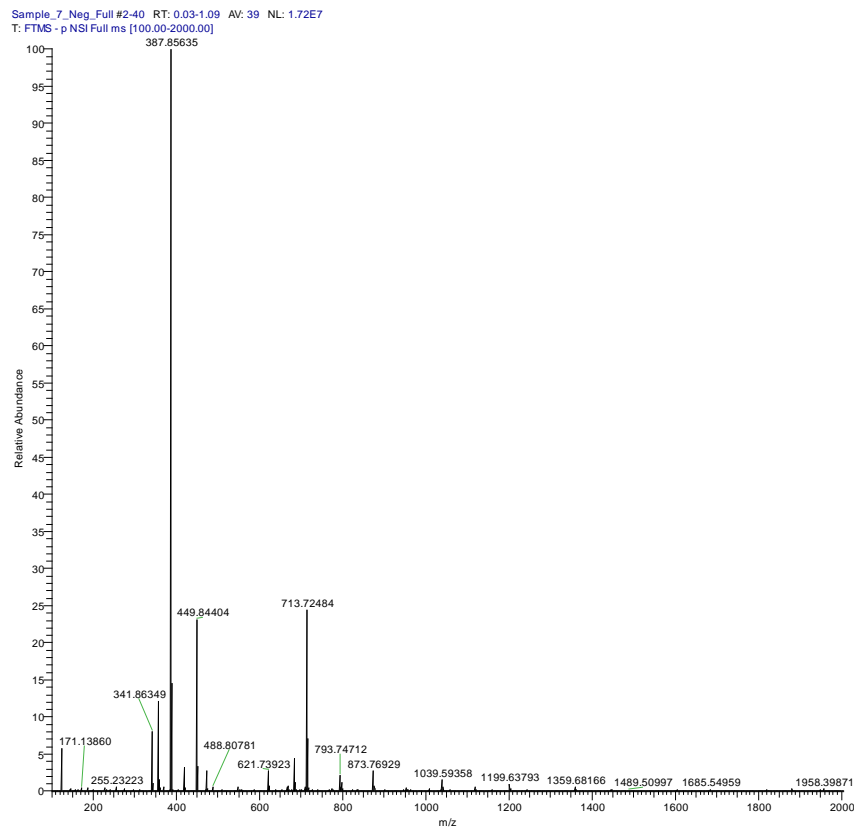

**Figure. S18.** HRMS data for PFOA precipitate (dissolved in 1:20 DMSO:Water) formed after the reaction of PFOA and CAN.

### Sample submission report

Sample Analysis Request # **3092932**  
Samples submitted by **Jun Sun**  
Date run **2020-12-08**  
Operator **Chowdhury Sarowar**  
Report prepared by **Chowdhury Sarowar**

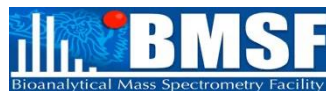

Notes:

Sample: 9

Full spectrum

Sample\_9\_Neg\_Full #2-40 RT: 0.05-1.11 Av: 39 NL: 1.43E7  
T: FTMS - p NSI Full ms [100.00-2000.00]

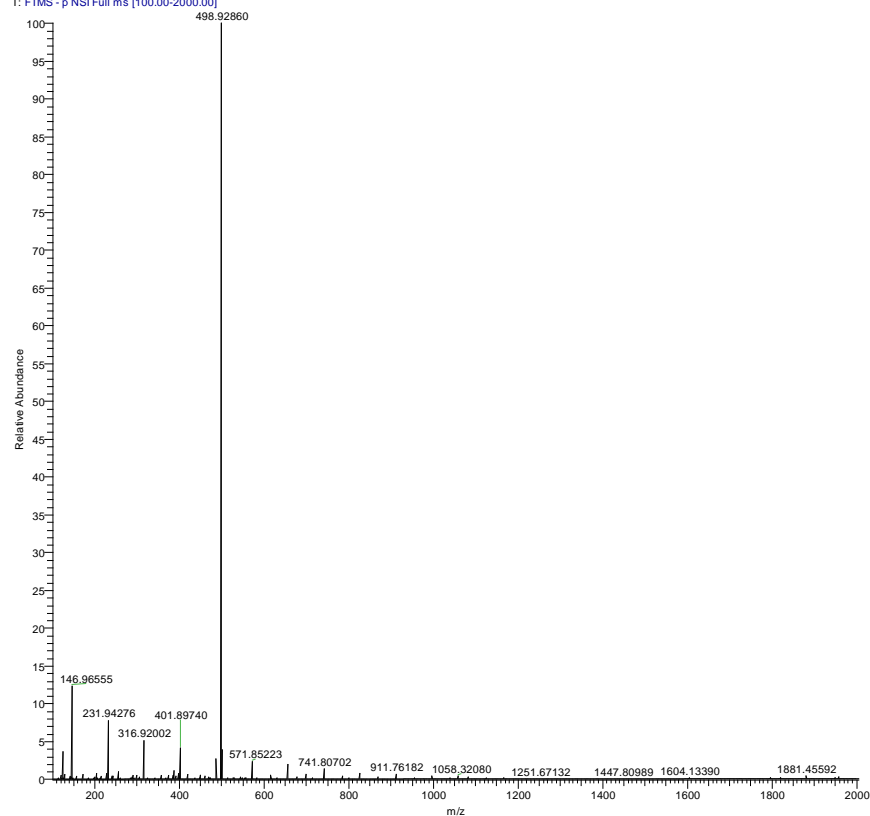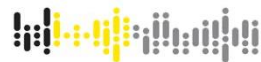

**Figure. S19.** HRMS data for PFOS precipitate (dissolved in 1:20 DMSO:Water) formed after the reaction of PFOS and CAN.
